# Supplementary material for: Takayasu arteritis in childhood: retrospective experience from a tertiary referral centre in the United Kingdom
Source: PubMed Central journal article supplement (PMC4392477; doi:10.1186/s13075-015-0545-1), 2015-02-25
Supplement: 13075_2015_545_MOESM4_ESM.pdf [file 13075_2015_545_MOESM4_ESM.pdf]

# PAEDIATRIC VASCULITIS ACTIVITY SCORE

Tick "Active" box **only** if abnormality due to active vasculitis is newly present or worse over the last 4 weeks or persists for less than 3 months. After that, if ALL items are persistent and represent smouldering/low grade/grumbling disease, and there are no new/worse features, please tick the box at the bottom right corner. At the very first assessment all active items are considered as active/worse. If there are no abnormalities in a system, please tick the "None" box. For items present longer than 3 months refer to the Vasculitis Damage Index to score damage.

|                                                                                | None                  | Active |                                                                                                                                           | None                  | Active |
|--------------------------------------------------------------------------------|-----------------------|--------|-------------------------------------------------------------------------------------------------------------------------------------------|-----------------------|--------|
| <b>1. General</b>                                                              | <input type="radio"/> |        | <b>6. Cardiovascular</b>                                                                                                                  | <input type="radio"/> |        |
| Myalgia                                                                        | <input type="radio"/> |        | Loss of pulses                                                                                                                            | <input type="radio"/> |        |
| Arthralgia or arthritis                                                        | <input type="radio"/> |        | Bruits over accessible arteries                                                                                                           | <input type="radio"/> |        |
| Fever $\geq 38.0^{\circ}\text{C}$                                              | <input type="radio"/> |        | Blood pressure discrepancy                                                                                                                | <input type="radio"/> |        |
| Weight Loss $\geq 5\%$ body weight                                             | <input type="radio"/> |        | Caudication of extremities                                                                                                                | <input type="radio"/> |        |
|                                                                                |                       |        | Ischaemic cardiac pain                                                                                                                    | <input type="radio"/> |        |
| <b>2. Cutaneous</b>                                                            | <input type="radio"/> |        | Cardiomyopathy                                                                                                                            | <input type="radio"/> |        |
| Polymorphous exanthema                                                         | <input type="radio"/> |        | Congestive cardiac failure                                                                                                                | <input type="radio"/> |        |
| Livedo                                                                         | <input type="radio"/> |        | Valvular heart disease                                                                                                                    | <input type="radio"/> |        |
| Panniculitis                                                                   | <input type="radio"/> |        | Pericarditis                                                                                                                              | <input type="radio"/> |        |
| Purpura                                                                        | <input type="radio"/> |        | <b>7. Abdominal</b>                                                                                                                       | <input type="radio"/> |        |
| Skin nodules                                                                   | <input type="radio"/> |        | Abdominal pain                                                                                                                            | <input type="radio"/> |        |
| Infarct (nail edge lesion, splinter haemorrhage)                               | <input type="radio"/> |        | Peritonitis                                                                                                                               | <input type="radio"/> |        |
| Ulcer (full-thickness necrosis)                                                | <input type="radio"/> |        | Blood in stools or bloody diarrhoea                                                                                                       | <input type="radio"/> |        |
| Gangrene (extensive necrosis)                                                  | <input type="radio"/> |        | Bowel ischaemia                                                                                                                           | <input type="radio"/> |        |
| Other skin vasculitis (specify below)                                          | <input type="radio"/> |        |                                                                                                                                           |                       |        |
| <b>3. Mucous membranes/eyes</b>                                                | <input type="radio"/> |        | <b>8. Renal</b>                                                                                                                           | <input type="radio"/> |        |
| Mouth ulcers/granulomata                                                       | <input type="radio"/> |        | Hypertension $>95^{\text{th}}$ centile (for height)                                                                                       | <input type="radio"/> |        |
| Genital ulcers                                                                 | <input type="radio"/> |        | Proteinuria $>0.3\text{ g}/24\text{h}, >20\text{mmol}/\text{mg}$ creatinin                                                                | <input type="radio"/> |        |
| Adnexal inflammation                                                           | <input type="radio"/> |        | Haematuria $\geq 2+$ or 5 rbc/hpf or red cell casts                                                                                       | <input type="radio"/> |        |
| Significant proptosis                                                          | <input type="radio"/> |        | GFR 50-80ml/min/1.73 m <sup>2</sup>                                                                                                       | <input type="radio"/> |        |
| Red eye (Epi)scleritis                                                         | <input type="radio"/> |        | GFR 15-49 ml/min/1.73 m <sup>2</sup>                                                                                                      | <input type="radio"/> |        |
| Red eye conjunctivitis/ blepharitis/keratitis                                  | <input type="radio"/> |        | GFR $<15\text{ ml}/\text{min}/1.73\text{m}^2$                                                                                             | <input type="radio"/> |        |
| Uveitis                                                                        | <input type="radio"/> |        | Rise in creatinine $> 10\%$ or                                                                                                            |                       |        |
| Blurred vision                                                                 | <input type="radio"/> |        | Creatinine clearance (GFR) fall $> 25\%$                                                                                                  | <input type="radio"/> |        |
| Sudden visual loss                                                             | <input type="radio"/> |        | <b>9. Nervous system</b>                                                                                                                  | <input type="radio"/> |        |
| Retinal vasculitis/retinal vessel thrombosis/<br>retinal exudates/haemorrhages | <input type="radio"/> |        | Headache                                                                                                                                  | <input type="radio"/> |        |
|                                                                                |                       |        | Meningitis/encephalitis                                                                                                                   | <input type="radio"/> |        |
| <b>4. ENT</b>                                                                  | <input type="radio"/> |        | Organic confusion/cognitive dysfunction                                                                                                   | <input type="radio"/> |        |
| Nasal discharge/crusts/ulcers/granuloma                                        | <input type="radio"/> |        | Seizures (not hypertensive)                                                                                                               | <input type="radio"/> |        |
| Paranasal sinus involvement                                                    | <input type="radio"/> |        | Stroke                                                                                                                                    | <input type="radio"/> |        |
| Subglottic stenosis/ hoarseness /stridor                                       | <input type="radio"/> |        | Cord lesion                                                                                                                               | <input type="radio"/> |        |
| Conductive hearing loss                                                        | <input type="radio"/> |        | Cranial nerve palsy                                                                                                                       | <input type="radio"/> |        |
| Sensorineural hearing loss                                                     | <input type="radio"/> |        | Sensory peripheral neuropathy                                                                                                             | <input type="radio"/> |        |
|                                                                                |                       |        | Motor mononeuritis multiplex                                                                                                              | <input type="radio"/> |        |
| <b>5. Chest</b>                                                                | <input type="radio"/> |        | <b>10. OTHER</b>                                                                                                                          | <input type="radio"/> |        |
| Wheeze or expiratory dyspnea                                                   | <input type="radio"/> |        |                                                                                                                                           | <input type="radio"/> |        |
| Endobronchial/endotracheal involvement                                         | <input type="radio"/> |        |                                                                                                                                           | <input type="radio"/> |        |
| Nodules or cavities                                                            | <input type="radio"/> |        |                                                                                                                                           |                       |        |
| Pleural effusion/pleurisy                                                      | <input type="radio"/> |        | <b>NO NEW/WORSE DISEASE :</b>                                                                                                             |                       |        |
| Infiltrate                                                                     | <input type="radio"/> |        | Tick here if there is no new/worse abnormality present in ANY of the systems above and active items represent low grade grumbling disease |                       |        |
| Massive haemoptysis/Alveolar haemorrhage                                       | <input type="radio"/> |        |                                                                                                                                           |                       |        |
| Respiratory failure                                                            | <input type="radio"/> |        |                                                                                                                                           |                       |        |
