# Supplementary material for: Takayasu arteritis in childhood: retrospective experience from a tertiary referral centre in the United Kingdom
Source: PubMed Central journal article supplement (PMC4392477; doi:10.1186/s13075-015-0545-1), 2015-02-25
Supplement: 13075_2015_545_MOESM5_ESM.pdf [file 13075_2015_545_MOESM5_ESM.pdf]

| <b>Glossary and scoring for PVAS.</b> GENERAL RULE: disease features are scored only when they are due to active vasculitis, after excluding other causes (e.g. infection, hypertension, etc.). If the feature is due to active disease, it is scored in the boxes. It is essential to apply these principles to each item below. Scores have been weighted according to the severity which each symptom or sign is thought to represent. Tick "Persistent Disease" box if all the abnormalities are due to active (but not new or worse) vasculitis. If any of the abnormalities are due to new/worse disease, DO NOT tick the "Persistent Disease" box. For some features, further information (from specialist opinion or further tests) is required if abnormality is newly present or worse. Remember that in most instances, you will be able to complete the whole record when you see the patient. However, you may need further information before entering some items. Please leave these items blank, until the information is available, and then fill them in. For example, if the patient has new onset of stridor, you would usually ask an ENT colleague to investigate this further to determine whether or not it is due to active Wegener's granulomatosis. |                                                                                                                                                                                                                                                                                                                                                                | <b>PVAS persistent</b> | <b>PVAS new/worse</b> |
|--------------------------------------------------------------------------------------------------------------------------------------------------------------------------------------------------------------------------------------------------------------------------------------------------------------------------------------------------------------------------------------------------------------------------------------------------------------------------------------------------------------------------------------------------------------------------------------------------------------------------------------------------------------------------------------------------------------------------------------------------------------------------------------------------------------------------------------------------------------------------------------------------------------------------------------------------------------------------------------------------------------------------------------------------------------------------------------------------------------------------------------------------------------------------------------------------------------------------------------------------------------------------------|----------------------------------------------------------------------------------------------------------------------------------------------------------------------------------------------------------------------------------------------------------------------------------------------------------------------------------------------------------------|------------------------|-----------------------|
| <b>1. General</b>                                                                                                                                                                                                                                                                                                                                                                                                                                                                                                                                                                                                                                                                                                                                                                                                                                                                                                                                                                                                                                                                                                                                                                                                                                                              | <b>Maximum scores</b>                                                                                                                                                                                                                                                                                                                                          | <b>2</b>               | <b>3</b>              |
| Myalgia                                                                                                                                                                                                                                                                                                                                                                                                                                                                                                                                                                                                                                                                                                                                                                                                                                                                                                                                                                                                                                                                                                                                                                                                                                                                        | Diffuse, spontaneous, hard to localize muscle pain or tenderness on muscle palpation. Exclude fibromyalgia.                                                                                                                                                                                                                                                    | 1                      | 1                     |
| Arthralgia or arthritis                                                                                                                                                                                                                                                                                                                                                                                                                                                                                                                                                                                                                                                                                                                                                                                                                                                                                                                                                                                                                                                                                                                                                                                                                                                        | Joint pain in any number of joints or presence of objective signs of active synovitis: intraarticular swelling due to synovial proliferation and/or joint effusion with limited range of movement and/or pain on movement or joint tenderness. Any number of joints.                                                                                           | 1                      | 1                     |
| Fever $\geq 38.0^{\circ}\text{C}$                                                                                                                                                                                                                                                                                                                                                                                                                                                                                                                                                                                                                                                                                                                                                                                                                                                                                                                                                                                                                                                                                                                                                                                                                                              | Documented temperature elevation $>38^{\circ}\text{C}$ . The value refers to axillary/oral temperature (rectal temperature $0.5^{\circ}\text{C}$ higher). Exclude infections by appropriate cultures, serology and PCR methods.                                                                                                                                | 2                      | 2                     |
| Weight Loss $\geq 5\%$ body weight                                                                                                                                                                                                                                                                                                                                                                                                                                                                                                                                                                                                                                                                                                                                                                                                                                                                                                                                                                                                                                                                                                                                                                                                                                             | At least 5% loss of body weight (not fluid) having occurred since last assessment or in the 4 weeks not as a consequence of dieting                                                                                                                                                                                                                            | 2                      | 2                     |
| <b>2. Cutaneous</b>                                                                                                                                                                                                                                                                                                                                                                                                                                                                                                                                                                                                                                                                                                                                                                                                                                                                                                                                                                                                                                                                                                                                                                                                                                                            | <b>Maximum scores</b>                                                                                                                                                                                                                                                                                                                                          | <b>3</b>               | <b>6</b>              |
| Polymorphous exanthema                                                                                                                                                                                                                                                                                                                                                                                                                                                                                                                                                                                                                                                                                                                                                                                                                                                                                                                                                                                                                                                                                                                                                                                                                                                         | Non-haemorrhagic, non-necrotising skin eruption of any type or combined types. Exclude allergy/drug reaction/infection                                                                                                                                                                                                                                         | 1                      | 1                     |
| Livedo                                                                                                                                                                                                                                                                                                                                                                                                                                                                                                                                                                                                                                                                                                                                                                                                                                                                                                                                                                                                                                                                                                                                                                                                                                                                         | Purplish reticular pattern usually irregularly distributed around subcutaneous fat lobules, often more prominent with cooling, common over foot margins. Exclude antiphospholipid syndrome.                                                                                                                                                                    | 1                      | 1                     |
| Panniculitis                                                                                                                                                                                                                                                                                                                                                                                                                                                                                                                                                                                                                                                                                                                                                                                                                                                                                                                                                                                                                                                                                                                                                                                                                                                                   | Single or multiple tender deep subcutaneous nodules caused by inflammation of deep subcutaneous tissue with typical histopathology findings if biopsy performed                                                                                                                                                                                                | 1                      | 1                     |
| Purpura                                                                                                                                                                                                                                                                                                                                                                                                                                                                                                                                                                                                                                                                                                                                                                                                                                                                                                                                                                                                                                                                                                                                                                                                                                                                        | Petechiae (small red spots), palpable purpura, or ecchymoses (large plaques) in skin or oozing (in the absence of trauma) in the mucous membranes.                                                                                                                                                                                                             | 1                      | 2                     |
| Skin nodules                                                                                                                                                                                                                                                                                                                                                                                                                                                                                                                                                                                                                                                                                                                                                                                                                                                                                                                                                                                                                                                                                                                                                                                                                                                                   | Subcutaneous nodules, often along arteries, tender on palpation.                                                                                                                                                                                                                                                                                               | 1                      | 1                     |
| Infarct                                                                                                                                                                                                                                                                                                                                                                                                                                                                                                                                                                                                                                                                                                                                                                                                                                                                                                                                                                                                                                                                                                                                                                                                                                                                        | Nail edge lesion, splinter haemorrhage or flea bite lesion of small vessel vasculitis                                                                                                                                                                                                                                                                          | 1                      | 1                     |
| Ulcer                                                                                                                                                                                                                                                                                                                                                                                                                                                                                                                                                                                                                                                                                                                                                                                                                                                                                                                                                                                                                                                                                                                                                                                                                                                                          | Area of full-thickness skin/subcutaneous tissue ulceration/necrosis                                                                                                                                                                                                                                                                                            | 1                      | 4                     |
| Gangrene                                                                                                                                                                                                                                                                                                                                                                                                                                                                                                                                                                                                                                                                                                                                                                                                                                                                                                                                                                                                                                                                                                                                                                                                                                                                       | Extensive skin/subcutaneous tissue/underlying structure necrosis, digital phalanx or other peripheral (nose, ear tips) necrosis/gangrene                                                                                                                                                                                                                       | 2                      | 6                     |
| Other skin vasculitis                                                                                                                                                                                                                                                                                                                                                                                                                                                                                                                                                                                                                                                                                                                                                                                                                                                                                                                                                                                                                                                                                                                                                                                                                                                          | Vasculitis different from previous e.g. subcutaneous swelling/oedema due to capillary leak in small vessel involvement, Raynaud's phenomenon etc.                                                                                                                                                                                                              | 1                      | 1                     |
| <b>3. Mucous membranes/eyes</b>                                                                                                                                                                                                                                                                                                                                                                                                                                                                                                                                                                                                                                                                                                                                                                                                                                                                                                                                                                                                                                                                                                                                                                                                                                                | <b>Maximum scores</b>                                                                                                                                                                                                                                                                                                                                          | <b>3</b>               | <b>6</b>              |
| Mouth ulcers/granulomata                                                                                                                                                                                                                                                                                                                                                                                                                                                                                                                                                                                                                                                                                                                                                                                                                                                                                                                                                                                                                                                                                                                                                                                                                                                       | Aphthous stomatitis, ischaemic ulcers and/or granulomatous inflammation in oral cavity. Exclude other causes (SLE, infection)                                                                                                                                                                                                                                  | 1                      | 2                     |
| Genital ulcers                                                                                                                                                                                                                                                                                                                                                                                                                                                                                                                                                                                                                                                                                                                                                                                                                                                                                                                                                                                                                                                                                                                                                                                                                                                                 | Ulcers localised in the genitalia or perineum, excluding infections.                                                                                                                                                                                                                                                                                           | 1                      | 1                     |
| Adnexal inflammation                                                                                                                                                                                                                                                                                                                                                                                                                                                                                                                                                                                                                                                                                                                                                                                                                                                                                                                                                                                                                                                                                                                                                                                                                                                           | Salivary (diffuse, tender swelling unrelated to meals) or lacrimal gland inflammation. Exclude other causes (infection). Specialist opinion preferably required.                                                                                                                                                                                               | 2                      | 4                     |
| Significant proptosis                                                                                                                                                                                                                                                                                                                                                                                                                                                                                                                                                                                                                                                                                                                                                                                                                                                                                                                                                                                                                                                                                                                                                                                                                                                          | Protrusion of the eyeball due to significant amounts of inflammatory in the orbit; if unilateral, there should be a difference of 2 mm between one eye and the other. This may be associated with diplopia due to infiltration of extra-ocular muscles. Developing myopia (measured on best visual acuity, see later) can also be a manifestation of proptosis | 2                      | 4                     |
| Red eye (Epi)scleritis                                                                                                                                                                                                                                                                                                                                                                                                                                                                                                                                                                                                                                                                                                                                                                                                                                                                                                                                                                                                                                                                                                                                                                                                                                                         | Inflammation of the sclerae (specialist opinion usually required). Can be heralded by photophobia.                                                                                                                                                                                                                                                             | 1                      | 2                     |
| Red eye conjunctivitis                                                                                                                                                                                                                                                                                                                                                                                                                                                                                                                                                                                                                                                                                                                                                                                                                                                                                                                                                                                                                                                                                                                                                                                                                                                         | Inflammation of the conjunctivae (exclude infectious causes and excluding uveitis as cause of red eye, also exclude conjunctivitis sicca which should not be scored as this is not a feature of active vasculitis); (specialist opinion not usually required).                                                                                                 | 1                      | 1                     |
| Blepharitis                                                                                                                                                                                                                                                                                                                                                                                                                                                                                                                                                                                                                                                                                                                                                                                                                                                                                                                                                                                                                                                                                                                                                                                                                                                                    | Inflammation of eyelids. Exclude other causes (trauma, infection). Usually no specialist opinion is required                                                                                                                                                                                                                                                   |                        |                       |
| Keratitis                                                                                                                                                                                                                                                                                                                                                                                                                                                                                                                                                                                                                                                                                                                                                                                                                                                                                                                                                                                                                                                                                                                                                                                                                                                                      | Inflammation of central or peripheral cornea as evaluated by specialist                                                                                                                                                                                                                                                                                        |                        |                       |
| Blurred vision                                                                                                                                                                                                                                                                                                                                                                                                                                                                                                                                                                                                                                                                                                                                                                                                                                                                                                                                                                                                                                                                                                                                                                                                                                                                 | Altered measurement of best visual acuity from previous or baseline, requiring specialist opinion for further evaluation.                                                                                                                                                                                                                                      | 2                      | 3                     |
| Sudden visual loss                                                                                                                                                                                                                                                                                                                                                                                                                                                                                                                                                                                                                                                                                                                                                                                                                                                                                                                                                                                                                                                                                                                                                                                                                                                             | Sudden loss of vision requiring ophthalmological assessment.                                                                                                                                                                                                                                                                                                   |                        | 6                     |
| Uveitis                                                                                                                                                                                                                                                                                                                                                                                                                                                                                                                                                                                                                                                                                                                                                                                                                                                                                                                                                                                                                                                                                                                                                                                                                                                                        | Inflammation of the uvea (iris, ciliary body, choroid) confirmed by ophthalmologist.                                                                                                                                                                                                                                                                           | 2                      | 6                     |
| Retinal vasculitis                                                                                                                                                                                                                                                                                                                                                                                                                                                                                                                                                                                                                                                                                                                                                                                                                                                                                                                                                                                                                                                                                                                                                                                                                                                             | Retinal vessel sheathing on examination by specialist or confirmed by retinal fluorescein angiography                                                                                                                                                                                                                                                          |                        |                       |
| Retinal vessel thrombosis                                                                                                                                                                                                                                                                                                                                                                                                                                                                                                                                                                                                                                                                                                                                                                                                                                                                                                                                                                                                                                                                                                                                                                                                                                                      | Arterial or venous retinal blood vessel occlusion                                                                                                                                                                                                                                                                                                              | 2                      | 6                     |
| Retinal exudates                                                                                                                                                                                                                                                                                                                                                                                                                                                                                                                                                                                                                                                                                                                                                                                                                                                                                                                                                                                                                                                                                                                                                                                                                                                               | Any area of soft retinal exudates (exclude hard exudates) seen on ophthalmoscopic examination.                                                                                                                                                                                                                                                                 |                        |                       |
| Retinal haemorrhages                                                                                                                                                                                                                                                                                                                                                                                                                                                                                                                                                                                                                                                                                                                                                                                                                                                                                                                                                                                                                                                                                                                                                                                                                                                           | Any area of retinal haemorrhage seen on ophthalmoscopic examination.                                                                                                                                                                                                                                                                                           |                        |                       |
| <b>4. ENT</b>                                                                                                                                                                                                                                                                                                                                                                                                                                                                                                                                                                                                                                                                                                                                                                                                                                                                                                                                                                                                                                                                                                                                                                                                                                                                  | <b>Maximum scores</b>                                                                                                                                                                                                                                                                                                                                          | <b>3</b>               | <b>6</b>              |
| Bloody nasal discharge/ nasal crusts/ulcers and/or granulomata                                                                                                                                                                                                                                                                                                                                                                                                                                                                                                                                                                                                                                                                                                                                                                                                                                                                                                                                                                                                                                                                                                                                                                                                                 | Bloody, mucopurulent, nasal secretion, light or dark brown crusts frequently obstructing the nose, nasal ulcers and/or granulomatous lesions observed by rhinoscopy                                                                                                                                                                                            | 2                      | 4                     |
| Paranasal sinus involvement                                                                                                                                                                                                                                                                                                                                                                                                                                                                                                                                                                                                                                                                                                                                                                                                                                                                                                                                                                                                                                                                                                                                                                                                                                                    | Tenderness or pain over paranasal sinuses usually with pathologic imaging (CT, MR, x-ray, ultrasound)                                                                                                                                                                                                                                                          | 1                      | 2                     |
| Subglottic stenosis                                                                                                                                                                                                                                                                                                                                                                                                                                                                                                                                                                                                                                                                                                                                                                                                                                                                                                                                                                                                                                                                                                                                                                                                                                                            | Stridor and hoarseness due to inflammation and narrowing of the subglottic area observed by laryngoscopy                                                                                                                                                                                                                                                       | 3                      | 6                     |
|                                                                                                                                                                                                                                                                                                                                                                                                                                                                                                                                                                                                                                                                                                                                                                                                                                                                                                                                                                                                                                                                                                                                                                                                                                                                                |                                                                                                                                                                                                                                                                                                                                                                | <b>PVAS persistent</b> | <b>PVAS new/worse</b> |
| Conductive hearing loss                                                                                                                                                                                                                                                                                                                                                                                                                                                                                                                                                                                                                                                                                                                                                                                                                                                                                                                                                                                                                                                                                                                                                                                                                                                        | Hearing loss due to middle ear involvement confirmed by otoscopy and/or tuning fork examination and/or audiometry                                                                                                                                                                                                                                              | 1                      | 3                     |

|                                                                   |                                                                                                                                                                                                                                            |          |           |
|-------------------------------------------------------------------|--------------------------------------------------------------------------------------------------------------------------------------------------------------------------------------------------------------------------------------------|----------|-----------|
| Sensorineural hearing loss                                        | Hearing loss due to auditory nerve or cochlear damage confirmed by audiometry                                                                                                                                                              | 2        | 6         |
| <b>5. Chest</b>                                                   | <b>Maximum scores</b>                                                                                                                                                                                                                      | <b>3</b> | <b>6</b>  |
| Wheeze or expiratory dyspnea                                      | Clinical signs of bronchial obstruction on examination                                                                                                                                                                                     | 1        | 2         |
| Nodules or cavities                                               | New lesions, detected by CXR                                                                                                                                                                                                               |          | 3         |
| Pleural effusion/pleurisy                                         | Pleural pain and/or friction rub on clinical assessment or new onset of radiologically confirmed pleural effusion. Other causes (e.g. infection, malignancy) should be excluded                                                            | 2        | 4         |
| Infiltrate                                                        | Detected by CXR or CT scan. Other causes (infection) should be excluded                                                                                                                                                                    | 2        | 4         |
| Endobronchial involvement                                         | Endobronchial pseudotumor or ulcerative lesions. Other causes such as infection or malignancy should be excluded. NB: smooth stenotic lesions to be included in VDI; subglottic lesions to be recorded in the ENT section.                 | 2        | 4         |
| Massive haemoptysis/alveolar haemorrhage                          | Major pulmonary bleeding, with shifting pulmonary infiltrates; other causes of bleeding should be excluded if possible                                                                                                                     | 4        | 6         |
| Respiratory failure                                               | Dyspnoea which is sufficiently severe as to require artificial ventilation                                                                                                                                                                 | 4        | 6         |
| <b>6. Cardiovascular</b>                                          | <b>Maximum scores</b>                                                                                                                                                                                                                      | <b>3</b> | <b>6</b>  |
| Loss of pulses                                                    | Loss of pulses in any vessel detected clinically; this may include loss of pulses leading to threatened loss of limb                                                                                                                       | 1        | 4         |
| Bruits over accessible arteries                                   | Audible murmurs on auscultation or palpable bruits/thrills over large arteries and aorta                                                                                                                                                   | 1        | 2         |
| Blood pressure discrepancy                                        | >10 mm Hg difference in any limb                                                                                                                                                                                                           | 1        | 2         |
| Claudication of extremities                                       | Focal muscle pain elicited usually by physical activity                                                                                                                                                                                    | 1        | 2         |
| Ischaemic cardiac pain                                            | Typical clinical history of cardiac pain leading to myocardial infarction or angina.                                                                                                                                                       | 2        | 4         |
| Cardiomyopathy                                                    | Significant impairment of cardiac function due to poor ventricular wall motion confirmed on echocardiography.                                                                                                                              | 3        | 6         |
| Congestive cardiac failure                                        | Heart failure by history or clinical examination                                                                                                                                                                                           | 3        | 6         |
| Valvular heart disease                                            | Significant valve abnormalities in the aortic mitral or pulmonary valves detected clinically or echocardiographically.                                                                                                                     | 2        | 4         |
| Pericarditis                                                      | Pericardial pain &/or friction rub on clinical assessment                                                                                                                                                                                  | 1        | 3         |
| <b>7. Abdominal</b>                                               | <b>Maximum scores</b>                                                                                                                                                                                                                      | <b>5</b> | <b>9</b>  |
| Abdominal pain                                                    | Persistent or recurrent abdominal pain, other than vasculitic causes excluded                                                                                                                                                              | 2        | 4         |
| Peritonitis                                                       | Acute abdominal pain with peritonism/peritonitis due to perforation/infarction of small bowel, appendix or gallbladder etc., or acute pancreatitis confirmed by radiology/surgery/elevated amylase                                         | 3        | 9         |
| Blood in stools or bloody diarrhoea                               | Overt or occult blood in stools or bloody diarrhoea of recent onset; inflammatory bowel disease, anal fissure and infectious causes excluded.                                                                                              | 2        | 6         |
| Bowel ischaemia                                                   | Severe and recurrent abdominal pain often with GI bleeding due to ischaemic necrosis of the gut confirmed by imaging or at surgery, with typical appearances of aneurysms or abnormal vasculature characteristic of mesenteric vasculitis. | 3        | 9         |
| <b>8. Renal</b>                                                   | <b>Maximum scores</b>                                                                                                                                                                                                                      | <b>6</b> | <b>12</b> |
| Hypertension >95th centile                                        | Systolic blood pressure greater than 95 <sup>th</sup> centile by age and height                                                                                                                                                            | 1        | 4         |
| Proteinuria >0.3g/24hr or >20mmol/mg Cr                           | Persistent >20 mmol/mg creatinine and/or >0.3 g/24 hours.                                                                                                                                                                                  | 2        | 4         |
| Haematuria $\geq$ 5 rbc/hpf or red cell casts                     | 10 or more RBC per hpf ( high power field ), excluding urinary infection and urinary lithiasis (stone)                                                                                                                                     | 3        | 6         |
| GFR 50-80ml/min/1.73 m2                                           | Calculated or measured GFR 50-80mls/min/1.73m2.                                                                                                                                                                                            | 2        | 4         |
| GFR 15-49 ml/min/1.73 m2                                          | Calculated or measured GFR 15-49mls/min/1.73m2.                                                                                                                                                                                            | 3        | 6         |
| GFR <15 ml/min/1.73m2                                             | Calculated or measured GFR <15 mls/min/1.73m2                                                                                                                                                                                              | 4        | 8         |
| Rise in creatinine > 10% or Creatinine clearance (GFR) fall > 25% | Significant deterioration in renal function attributable to active vasculitis. Rise in creatinine >10% when compared to previous value or fall in calculated or measured GFR >25%                                                          |          | 6         |
| <b>9. Nervous system</b>                                          | <b>Maximum scores</b>                                                                                                                                                                                                                      | <b>6</b> | <b>9</b>  |
| Headache                                                          | New, unaccustomed & persistent headache                                                                                                                                                                                                    | 1        | 1         |
| Meningitis/encephalitis                                           | Severe headache with neck stiffness ascribed to inflammatory meningitis after excluding infection/bleeding                                                                                                                                 | 1        | 3         |
| Organic confusion/cognitive dysfunction                           | Impaired orientation, memory or other intellectual function in the absence of metabolic, psychiatric, pharmacological or toxic causes.                                                                                                     | 1        | 3         |
| Seizures (not hypertensive)                                       | Focal motor, generalised or psychomotoric epileptic paroxysm, due to CNS vasculitis. Exclude idiopathic epilepsy, febrile seizures                                                                                                         | 3        | 9         |
| Stroke                                                            | Cerebrovascular accident resulting in focal neurological signs as paresis, weakness etc.                                                                                                                                                   | 3        | 9         |
| Cord lesion                                                       | Transverse myelitis with lower extremity weakness or sensory loss (usually with a detectable sensory level) with loss of sphincter control (rectal & urinary bladder).                                                                     | 3        | 9         |
| Cranial nerve palsy                                               | Facial nerve palsy, recurrent nerve palsy, oculomotor nerve palsy etc. excluding sensorineural hearing loss and ophthalmic symptoms due to inflammation                                                                                    | 3        | 6         |
| Sensory peripheral neuropathy                                     | Sensory neuropathy resulting in glove &/or stocking distribution of sensory loss. Other causes should be excluded (e.g. idiopathic, metabolic, vitamin deficiencies, infectious, toxic, hereditary).                                       | 3        | 6         |
| Motor mononeuritis multiplex                                      | Simultaneous neuritis of single or many peripheral nerves, only scored if motor involvement. Other causes should be excluded (diabetes, sarcoidosis, carcinoma, amyloidosis).                                                              | 3        | 9         |
| <b>10. OTHER</b>                                                  | Other feature of active vasculitis (e.g. malaise, pulmonary hypertension, auricular chondritis etc.) - please describe                                                                                                                     |          |           |
